# Supplementary material for: Synthesis of water-soluble silicon-porphyrin: protolytic behaviour of axially coordinated hydroxy groups
Source: Royal Society of Chemistry journal article supplement (doi:10.1039/c5dt03654b), 2015-01-01
Supplement: c5dt03654b1.pdf [file c5dt03654b1.pdf]

## Electronic Supplementary Information

### ESI-1

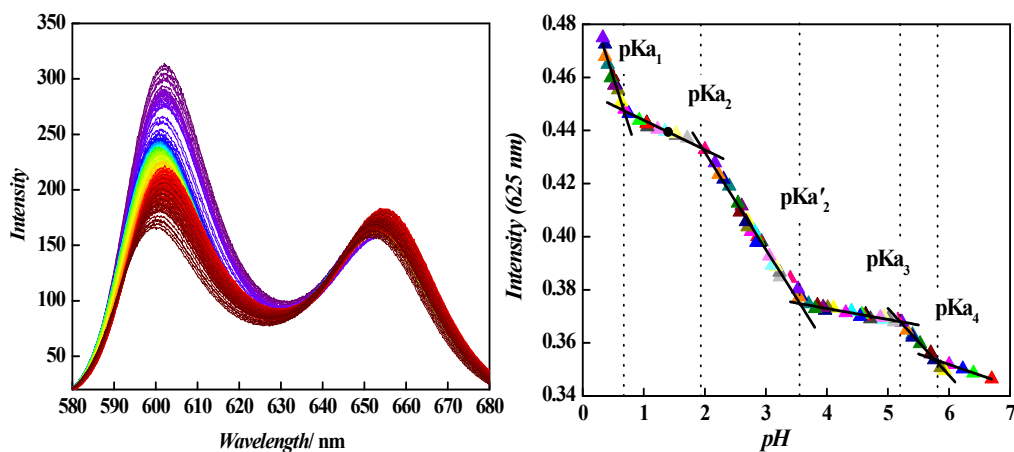

Figure ESI-1. Protolytic behavior of axial ligands of SiTCPP in CH<sub>3</sub>CN/H<sub>2</sub>O (8/2 v/v) observed by fluorescence spectroscopy (left) and estimation of pKa from the inflection points in the plot between fluorescence intensity at  $\lambda = 625$  nm and pH (right) (pKa<sub>1</sub> = 0.67, pKa<sub>2</sub> = 1.96, pKa'<sub>2</sub> = 3.56, pKa<sub>3</sub> = 5.20, pKa<sub>4</sub> = 5.76)

ESI-2

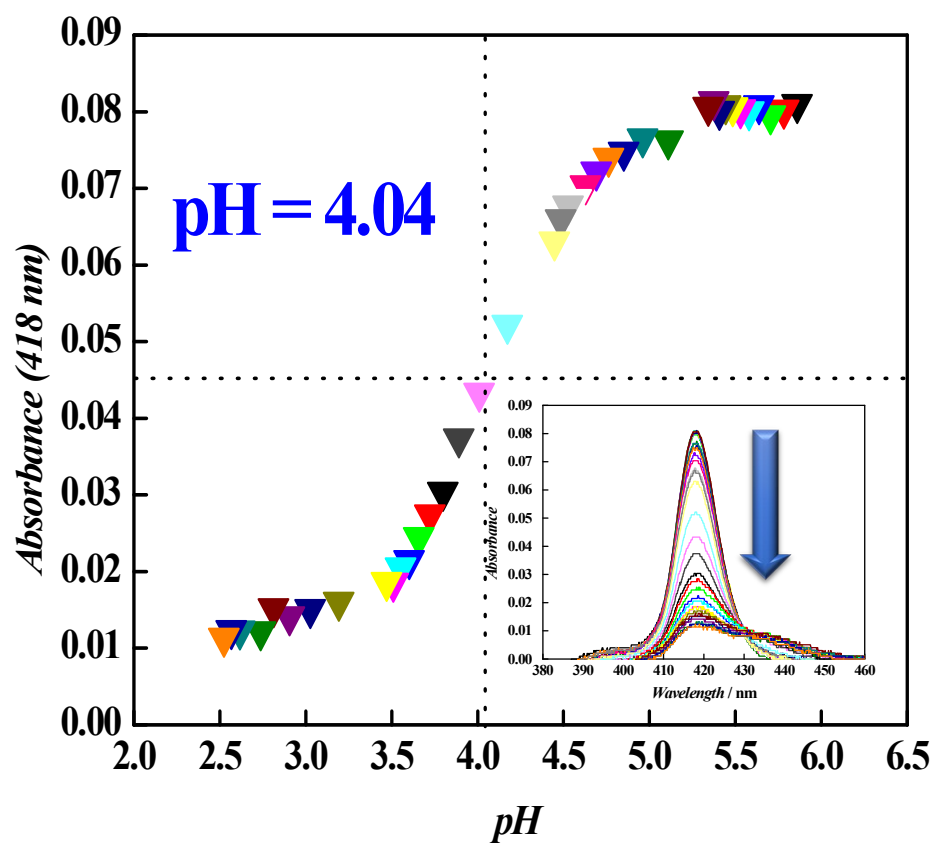

Figure ESI-2. Sudden decrease of solubility of SiTCPP in H<sub>2</sub>O at specific pH condition (pH = 4.04): The plot of absorbance at  $\lambda = 418$  nm against the pH values. The absorption spectral changes are shown in the inset.

## ESI-3

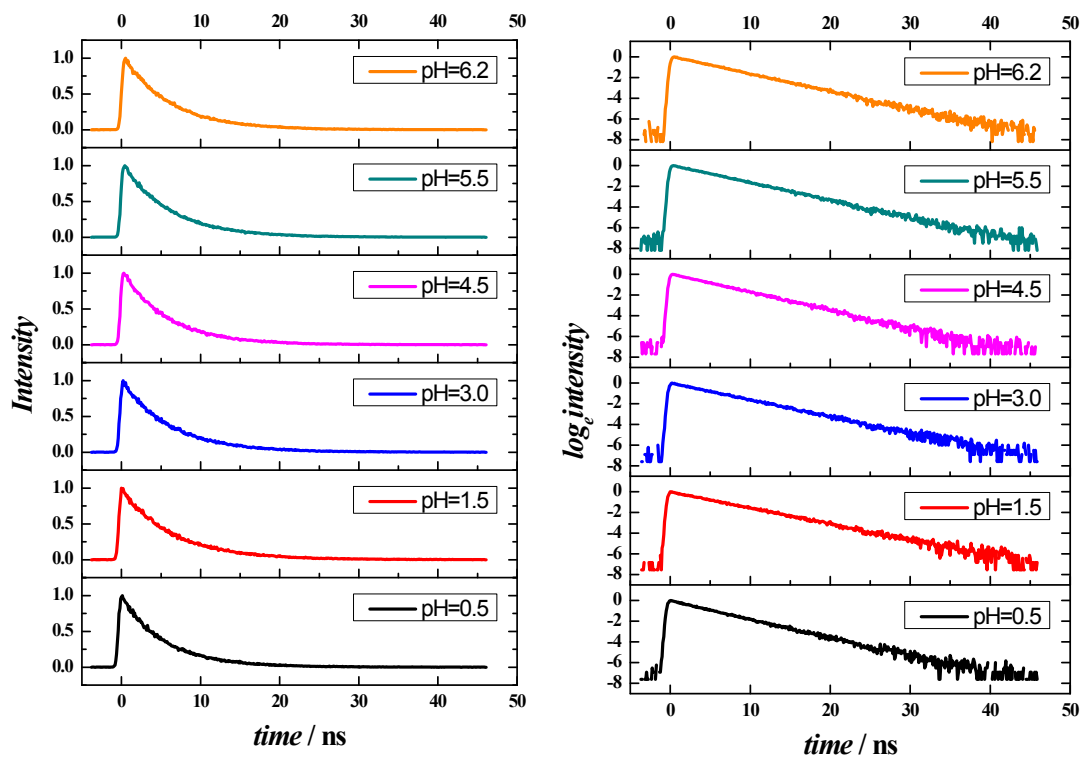

Figure ESI-3. Single exponential decay profile of fluorescence observed for SiTCPP in CH<sub>3</sub>CN/H<sub>2</sub>O (8/2 v/v) at various pH conditions, where each species in protolytic equilibria among the axial ligands exists according to the pK<sub>a</sub> values (pK<sub>a</sub><sub>1</sub> = 5.76, pK<sub>a</sub><sub>2</sub> = 5.20, pK<sub>a</sub><sub>2</sub>' = 3.56, pK<sub>a</sub><sub>3</sub> = 1.96, pK<sub>a</sub><sub>4</sub> = 0.67).

## ESI-4

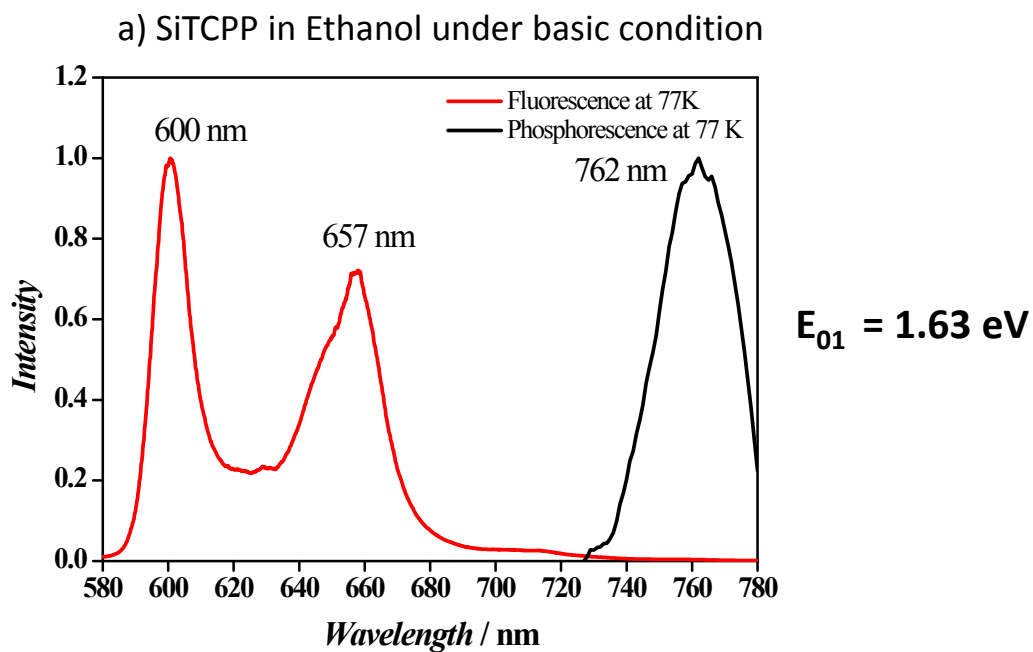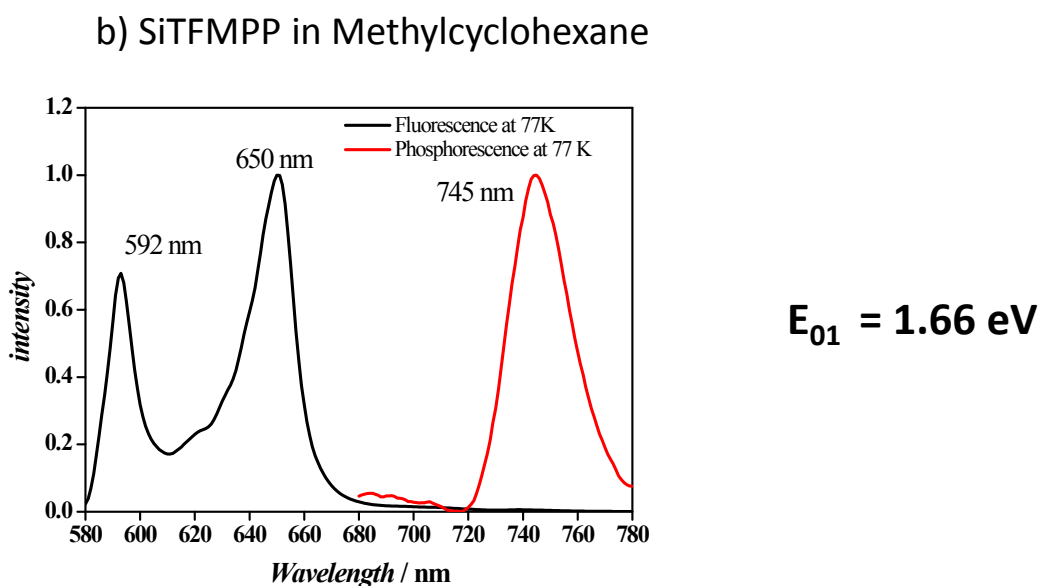

Figure ESI-4. Phosphorescence spectra of SiTCPP in basic ethanol at 77K and SiTFMPP in methylcyclohexane at 77 K. From their  $\lambda_{\text{max}}$ , the energy of the excited triplets states of SiTCPP (1.63 eV) and SiTFMPP (1.66 eV) were determined.

## ESI-5

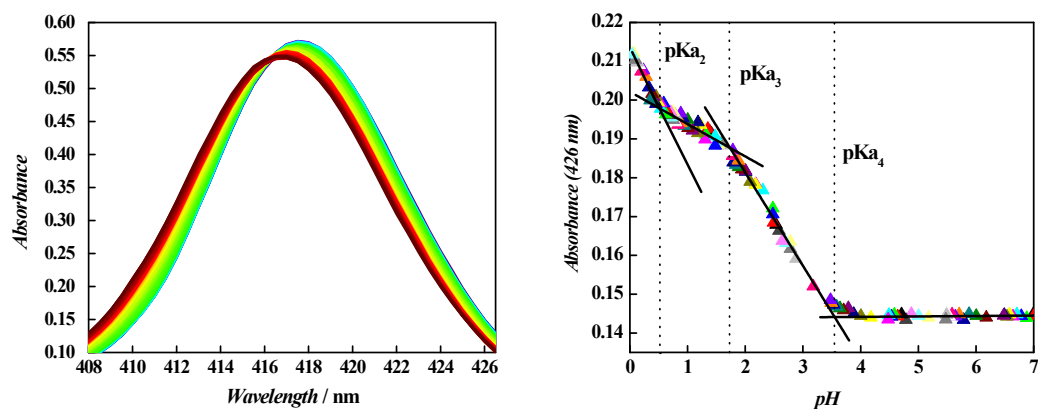

Figure ESI-5. Absorption spectra of SiTFMPP ( $1.2 \times 10^{-6}$  M in  $\text{CH}_3\text{CN}/\text{H}_2\text{O}$  (8/2 v/v)) under various pH conditions (left) and change of absorbance in the visible absorption spectra of SiTFMPP observed at  $\lambda = 426$  nm under various pH conditions (right). Three pKa's were estimated at this wavelength ( $\text{pKa}_1 = 0.50$ ,  $\text{pKa}_2 = 1.71$ ,  $\text{pKa}_3 = 3.54$ ).

## ESI-6

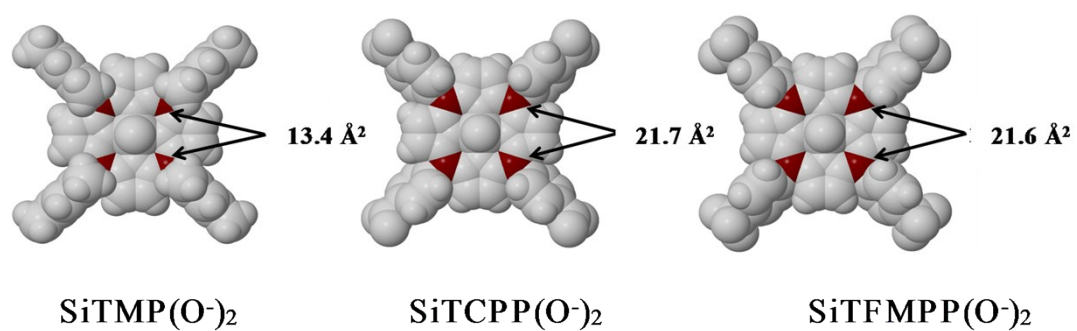

Figure ESI-6. Contact molecular surface area exposed outside of the four carbon atoms in the *meso*-position within the three Si-porphyrins: Top view of molecular structure optimized by DFT calculation with arrows indicating the carbon atoms in *meso*-position and their contact molecular surface area (Å<sup>2</sup>).
